# Supplementary material for: Prevalence, associated factors and outcomes of pressure injuries in adult intensive care unit patients: the DecubICUs study
Source: PubMed Central journal article supplement — Intensive Care Med. 2020 Oct 9;47(2):160–9. doi: 10.1007/s00134-020-06234-9 (PMC7880913; doi:10.1007/s00134-020-06234-9), 2020-10-09
Supplement: 134_2020_6234_MOESM6_ESM.pdf [file 134_2020_6234_MOESM6_ESM.pdf]

## Online Resource 6. Participation rates per continent and per country

| Continent     | Country              | ICUs (n) | Included patients per country (n) | Included patients per continent (n; %) |
|---------------|----------------------|----------|-----------------------------------|----------------------------------------|
| <b>Africa</b> |                      |          |                                   | <b>246 (1.9)</b>                       |
|               | Angola               | 1        | 5                                 |                                        |
|               | Ghana                | 4        | 12                                |                                        |
|               | Cameroon             | 1        | 1                                 |                                        |
|               | Kenya                | 2        | 13                                |                                        |
|               | Kingdom of Eswatini  | 1        | 3                                 |                                        |
|               | Libya                | 12       | 51                                |                                        |
|               | Nigeria              | 7        | 25                                |                                        |
|               | Mauritius            | 2        | 8                                 |                                        |
|               | Morocco              | 2        | 14                                |                                        |
|               | Rwanda               | 3        | 14                                |                                        |
|               | South Africa         | 4        | 36                                |                                        |
|               | Tunisia              | 7        | 64                                |                                        |
| <b>Asia</b>   |                      |          |                                   | <b>4424 (33.4)</b>                     |
|               | Bahrein              | 1        | 15                                |                                        |
|               | Bangladesh           | 1        | 25                                |                                        |
|               | Brunei               | 1        | 31                                |                                        |
|               | China                | 199      | 2479                              |                                        |
|               | India                | 10       | 133                               |                                        |
|               | Indonesia            | 4        | 43                                |                                        |
|               | Iran                 | 5        | 60                                |                                        |
|               | Israel               | 4        | 113                               |                                        |
|               | Japan                | 10       | 112                               |                                        |
|               | Lebanon              | 3        | 34                                |                                        |
|               | Malaysia             | 16       | 260                               |                                        |
|               | Mongolia             | 5        | 30                                |                                        |
|               | Nepal                | 3        | 20                                |                                        |
|               | Pakistan             | 1        | 17                                |                                        |
|               | Philippines          | 6        | 35                                |                                        |
|               | Qatar                | 1        | 6                                 |                                        |
|               | Republic of Korea    | 20       | 322                               |                                        |
|               | Saudi Arabia         | 3        | 32                                |                                        |
|               | Taiwan               | 1        | 57                                |                                        |
|               | Thailand             | 3        | 37                                |                                        |
|               | Turkey               | 32       | 443                               |                                        |
|               | United Arab Emirates | 10       | 120                               |                                        |
| <b>Europe</b> |                      |          |                                   | <b>5632 (42.5)</b>                     |
|               | Albania              | 3        | 13                                |                                        |
|               | Andorra              | 1        | 4                                 |                                        |
|               | Austria              | 5        | 36                                |                                        |
|               | Belgium              | 14       | 194                               |                                        |
|               | Estonia              | 7        | 64                                |                                        |
|               | Bosnia & Herzegovina | 1        | 6                                 |                                        |

|  |                                           |    |      |                    |
|--|-------------------------------------------|----|------|--------------------|
|  | Croatia                                   | 12 | 100  |                    |
|  | Cyprus                                    | 9  | 61   |                    |
|  | Czech Republic                            | 2  | 20   |                    |
|  | Denmark                                   | 19 | 149  |                    |
|  | Finland                                   | 9  | 75   |                    |
|  | France                                    | 27 | 350  |                    |
|  | Hungary                                   | 2  | 15   |                    |
|  | Germany                                   | 23 | 456  |                    |
|  | Greece                                    | 33 | 216  |                    |
|  | Iceland                                   | 3  | 17   |                    |
|  | Ireland                                   | 15 | 110  |                    |
|  | Italy                                     | 49 | 406  |                    |
|  | Kosovo                                    | 1  | 14   |                    |
|  | Latvia                                    | 2  | 7    |                    |
|  | Lithuania                                 | 1  | 24   |                    |
|  | Luxembourg                                | 4  | 49   |                    |
|  | Macedonia                                 | 4  | 29   |                    |
|  | Moldova                                   | 1  | 45   |                    |
|  | Netherlands                               | 19 | 269  |                    |
|  | Norway                                    | 25 | 119  |                    |
|  | Poland                                    | 6  | 38   |                    |
|  | Portugal                                  | 22 | 197  |                    |
|  | Romania                                   | 6  | 72   |                    |
|  | Russian Federation                        | 16 | 190  |                    |
|  | Serbia                                    | 6  | 61   |                    |
|  | Slovakia                                  | 4  | 26   |                    |
|  | Slovenia                                  | 8  | 83   |                    |
|  | Spain                                     | 56 | 541  |                    |
|  | Sweden                                    | 16 | 115  |                    |
|  | Switzerland                               | 5  | 119  |                    |
|  | United Kingdom                            | 94 | 1312 |                    |
|  | Ukraine                                   | 2  | 30   |                    |
|  | <b>Latin, Central &amp; South America</b> |    |      | <b>1040 (7.8)</b>  |
|  | Argentina                                 | 31 | 304  |                    |
|  | Bolivia                                   | 1  | 8    |                    |
|  | Brazil                                    | 26 | 382  |                    |
|  | Chile                                     | 6  | 62   |                    |
|  | Colombia                                  | 7  | 96   |                    |
|  | Ecuador                                   | 5  | 70   |                    |
|  | Paraguay                                  | 10 | 98   |                    |
|  | Suriname                                  | 3  | 5    |                    |
|  | Uruguay                                   | 1  | 11   |                    |
|  | Venezuela                                 | 1  | 4    |                    |
|  | <b>North America</b>                      |    |      | <b>1507 (11.4)</b> |
|  | Canada                                    | 29 | 437  |                    |
|  | Honduras                                  | 1  | 2    |                    |

|                |                   |             |               |                  |
|----------------|-------------------|-------------|---------------|------------------|
|                | Jamaica           | 1           | 8             |                  |
|                | Mexico            | 21          | 100           |                  |
|                | Trinidad & Tobago | 3           | 20            |                  |
|                | USA               | 25          | 940           |                  |
| <b>Oceania</b> |                   |             |               | <b>405 (3.1)</b> |
|                | Australia         | 16          | 288           |                  |
|                | New Zealand       | 13          | 117           |                  |
| <b>Total</b>   |                   | <b>1117</b> | <b>13,245</b> | <b>13,245</b>    |

Abbreviations: ICU, intensive care unit; n, number
