# Supplementary material for: Prevalence, associated factors and outcomes of pressure injuries in adult intensive care unit patients: the DecubICUs study
Source: PubMed Central journal article supplement — Intensive Care Med. 2020 Oct 9;47(2):160–9. doi: 10.1007/s00134-020-06234-9 (PMC7880913; doi:10.1007/s00134-020-06234-9), 2020-10-09
Supplement: 134_2020_6234_MOESM7_ESM.pdf [file 134_2020_6234_MOESM7_ESM.pdf]

## Online Resource 7. Characteristics of the participating units (n = 1117)

| Characteristics                                                       | All<br>(n = 1117; 100%) <sup>a</sup> | Europe<br>(n = 532; 47.59%) <sup>b</sup> | North America<br>(n = 81; 7.25%) <sup>c</sup> | Latin, Central and<br>South America<br>(n = 91; 8.14%) <sup>d</sup> | Asia<br>(n = 339; 30.32%) <sup>e</sup> | Africa<br>(n = 46; 4.11%) <sup>f</sup> | Oceania<br>(n = 29; 2.59%) <sup>g</sup> |
|-----------------------------------------------------------------------|--------------------------------------|------------------------------------------|-----------------------------------------------|---------------------------------------------------------------------|----------------------------------------|----------------------------------------|-----------------------------------------|
|                                                                       | <i>Numbers (percentages)</i>         |                                          |                                               |                                                                     |                                        |                                        |                                         |
| University / academic hospital                                        | 675 (60.4)                           | 324 (60.9)                               | 61 (75.3)                                     | 55 (60.4)                                                           | 189 (55.8)                             | 31 (67.4)                              | 15 (51.7)                               |
| Hospital capacity, M (IQR)                                            | 600 (329-1035)                       | 600 (326-981)                            | 450 (253-609)                                 | 302 (150-508)                                                       | 950 (550-1500)                         | 400 (189-730)                          | 341 (243-500)                           |
| Open type of ICU <sup>h</sup>                                         | 305 (27.3)                           | 137 (25.8)                               | 22 (27.2)                                     | 30 (33)                                                             | 90 (26.5)                              | 20 (43.5)                              | 6 (20.7)                                |
| Number of ICU beds, M (IQR)                                           | 13 (8-20)                            | 12 (8-18)                                | 15.50 (9-30)                                  | 14 (8-22)                                                           | 16 (10-24)                             | 8 (5-11)                               | 11 (8-21)                               |
| Number of patients treated in the ICU in 2017, M (IQR)                | 638 (374-1125)                       | 707 (417-1119.5)                         | 999 (350-1948)                                | 500 (330-1400)                                                      | 600 (350-1000)                         | 266 (150-530)                          | 941 (552-1958)                          |
| ICU specialty                                                         |                                      |                                          |                                               |                                                                     |                                        |                                        |                                         |
| Surgical cardiac                                                      | 38 (3.4)                             | 22 (4.1)                                 | 5 (6.2)                                       | 2 (2.2)                                                             | 8 (2.4)                                | NA                                     | 1 (3.4)                                 |
| Surgical non-cardiac                                                  | 17 (1.5)                             | 12 (2.3)                                 | 1 (1.2)                                       | -                                                                   | 4 (1.2)                                | NA                                     | NA                                      |
| Surgical mixed                                                        | 95 (8.5)                             | 53 (10)                                  | 8 (9.9)                                       | 1 (1.1)                                                             | 26 (7.7)                               | 4 (8.7)                                | 3 (10.3)                                |
| Trauma                                                                | 19 (1.7)                             | 9 (1.7)                                  | 2 (2.5)                                       | 1 (1.1)                                                             | 4 (1.2)                                | 3 (6.5)                                | NA                                      |
| Burns                                                                 | 3 (0.3)                              | 2 (0.4)                                  | NA                                            | NA                                                                  | 1 (0.3)                                | NA                                     | NA                                      |
| Transplantation                                                       | 6 (0.5)                              | 3 (0.6)                                  | NA                                            | 2 (2.2)                                                             | 1 (0.3)                                | NA                                     | NA                                      |
| Medical coronary                                                      | 15 (1.3)                             | 4 (0.8)                                  | 5 (6.2)                                       | 1 (1.1)                                                             | 4 (1.2)                                | 1 (2.2)                                | NA                                      |
| Medical neurologic                                                    | 17 (1.5)                             | 6 (1.1)                                  | 3 (3.7)                                       | 1 (1.1)                                                             | 7 (2.1)                                | NA                                     | NA                                      |
| Medical respiratory                                                   | 25 (2.2)                             | 6 (1.1)                                  | 1 (1.2)                                       | 2 (2.2)                                                             | 16 (4.7)                               | NA                                     | NA                                      |
| Medical mixed                                                         | 80 (7.2)                             | 26 (4.9)                                 | 3 (3.7)                                       | 6 (6.6)                                                             | 35 (10.3)                              | 10 (21.7)                              | NA                                      |
| Mixed medical - surgical                                              | 729 (65.2)                           | 353 (66.4)                               | 47 (58)                                       | 60 (65.9)                                                           | 219 (64.6)                             | 25 (54.3)                              | 25 (86.2)                               |
| Other                                                                 | 49 (4.4)                             | 26 (4.9)                                 | 5 (6.2)                                       | 10 (11)                                                             | 6 (1.8)                                | 2 (4.3)                                | NA                                      |
| Number of patients per nurse, M (IQR)                                 | 1.7 (1.1-2.2)                        | 1.5 (1.1-2.1)                            | 1.5 (1.1-1.7)                                 | 2.1 (1.8-3.4)                                                       | 1.9 (1.4-2.25)                         | 1.7 (1-2.4)                            | 1 (0.8-1.2)                             |
| Physiotherapist in ICU on study day                                   | 790 (70.7)                           | 450 (84.6)                               | 57 (70.4)                                     | 71 (78)                                                             | 150 (44.2)                             | 33 (71.7)                              | 29 (100)                                |
| Dietician in ICU on study day                                         | 516 (46.2)                           | 277 (52.1)                               | 71 (87.7)                                     | 59 (64.8)                                                           | 117 (34.5)                             | 15 (32.6)                              | 26 (89.7)                               |
| Participation in other pressure injury research on study day, M (IQR) | 232 (20.8)                           | 72 (13.5)                                | 14 (17.3)                                     | 9 (9.9)                                                             | 128 (37.8)                             | 7 (15.2)                               | 2 (6.9)                                 |
| Education on pressure injury staging in function of study day         |                                      |                                          |                                               |                                                                     |                                        |                                        |                                         |
| Yes, the ESICM module                                                 | 920 (82.3)                           | 436 (82)                                 | 72 (88.9)                                     | 67 (73.6)                                                           | 281 (82.9)                             | 37 (80.4)                              | 27 (93.1)                               |

|                                                             |                                                           |            |            |           |           |            |           |           |
|-------------------------------------------------------------|-----------------------------------------------------------|------------|------------|-----------|-----------|------------|-----------|-----------|
|                                                             | Yes, another module                                       | 85 (7.6)   | 41 (7.7)   | 8 (9.9)   | 6 (6.6)   | 28 (8.3)   | 1 (2.2)   | 1 (3.4)   |
|                                                             | No                                                        | 82 (7.6)   | 45 (8.5)   | NA        | 13 (14.3) | 21 (6.2)   | 2 (4.3)   | 1 (3.4)   |
| PI risk assessment scale used                               |                                                           |            |            |           |           |            |           |           |
|                                                             | No scale                                                  | 162 (14.5) | 91 (17.1)  | 4 (4.9)   | 13 (14.3) | 25 (7.4)   | 27 (58.7) | 2 (6.9)   |
|                                                             | Norton scale                                              | 121 (10.8) | 74 (13.9)  | 11 (13.6) | 16 (17.6) | 20 (5.9)   | NA        | NA        |
|                                                             | Braden scale                                              | 578 (51.7) | 194 (36.5) | 63 (77.8) | 52 (57.1) | 252 (74.3) | 10 (21.7) | 7 (24.1)  |
|                                                             | Waterlow scale                                            | 144 (12.9) | 94 (17.7)  | NA        | 1 (1.1)   | 24 (7.1)   | 5 (10.9)  | 20 (69)   |
|                                                             | Other scale                                               | 74 (6.6)   | 64 (12)    | 1 (1.2)   | NA        | 9 (2.7)    | NA        | NA        |
| Primary trigger for starting additional preventive measures |                                                           |            |            |           |           |            |           |           |
|                                                             | High risk profile as indicated by a risk assessment scale | 605 (54.1) | 264 (49.6) | 57 (70.4) | 46 (50.5) | 212 (62.5) | 9 (19.6)  | 17 (58.6) |
|                                                             | Mechanical ventilation                                    | 50 (4.5)   | 26 (4.9)   | 3 (3.7)   | 5 (5.5)   | 10 (2.9)   | 5 (10.9)  | 1 (3.4)   |
|                                                             | Anticipated ICU stay >3 days                              | 91 (8.1)   | 40 (7.5)   | 4 (4.9)   | 10 (11)   | 29 (8.6)   | 7 (15.2)  | 1 (3.4)   |
|                                                             | Coma - sedation                                           | 79 (7.1)   | 53 (10)    | 4 (4.9)   | 3 (3.3)   | 10 (2.9)   | 8 (17.4)  | 1 (3.4)   |
|                                                             | Vasopressor use                                           | 16 (1.4)   | 8 (1.5)    | NA        | 1 (1.1)   | 5 (1.5)    | 1 (2.2)   | 1 (3.4)   |
|                                                             | Malnutrition                                              | 20 (1.8)   | 10 (1.9)   | 2 (2.5)   | 1 (1.1)   | 7 (2.1)    | NA        | NA        |
|                                                             | Incontinence                                              | 8 (0.7)    | 2 (0.4)    | 1 (1.2)   | NA        | 5 (1.5)    | NA        | NA        |
|                                                             | Obesity                                                   | 24 (2.1)   | 11 (2.1)   | 1 (1.2)   | NA        | 6 (1.8)    | 5 (10.9)  | 1 (3.4)   |
|                                                             | Pressure injuries                                         | 115 (10.3) | 64 (12)    | 5 (6.2)   | 9 (9.9)   | 36 (10.6)  | 1 (2.2)   | NA        |
|                                                             | Other                                                     | 50 (4.5)   | 35 (6.6)   | 1 (1.2)   | 3 (3.3)   | 2 (0.6)    | 3 (6.5)   | 7 (24.1)  |

Abbreviations: M, median; IQR, interquartile range; ICU, intensive care unit; ESICM, European Society of Intensive Care Medicine; PI, pressure injuries, NA, not applicable

<sup>a</sup>Totals may not sum to 1117 owing to missing values.

<sup>b</sup>Totals may not sum to 532 owing to missing values.

<sup>c</sup>Totals may not sum to 81 owing to missing values.

<sup>d</sup>Totals may not sum to 91 owing to missing values.

<sup>e</sup>Totals may not sum to 339 owing to missing values.

<sup>f</sup>Totals may not sum to 46 owing to missing values.

<sup>g</sup>Totals may not sum to 29 owing to missing values.

<sup>h</sup>Open, non-ICU doctors may write orders
