# Supplementary material for: Prevalence, associated factors and outcomes of pressure injuries in adult intensive care unit patients: the DecubICUs study
Source: PubMed Central journal article supplement — Intensive Care Med. 2020 Oct 9;47(2):160–9. doi: 10.1007/s00134-020-06234-9 (PMC7880913; doi:10.1007/s00134-020-06234-9), 2020-10-09
Supplement: 134_2020_6234_MOESM8_ESM.pdf [file 134_2020_6234_MOESM8_ESM.pdf]

## Online Resource 8. Patient characteristics: completeness of data

| Total number of patients = 13,254       |                              |                          |                                                      |
|-----------------------------------------|------------------------------|--------------------------|------------------------------------------------------|
| Characteristic                          | Available data<br>Number (%) | Missing values<br>Number | Handling of missing data                             |
| Sex                                     | 13,252 (99.98)               | 2                        | None                                                 |
| Body weight                             | 12,563 (94.79)               | 691                      | Imputed with median                                  |
| Body length                             | 12,787 (96.48)               | 467                      | Imputed with median                                  |
| Mechanical ventilation on ICU admission | 13,213 (99.70)               | 41                       | None                                                 |
| Type of admission                       | 13,239 (99.89)               | 15                       | Deduced from other variables reported where possible |
| Reason for ICU admission                | 13,231 (99.83)               | 23                       | Deduced from other variables reported where possible |
| Simplified Acute Physiology Score II    |                              |                          |                                                      |
| Age                                     | 13,250 (99.97)               | 4                        | Imputed with median                                  |
| Heart rate                              | 13,227 (99.80)               | 27                       | Imputed with median                                  |
| Systolic blood pressure                 | 13,209 (99.67)               | 45                       | Imputed with median                                  |
| Body temperature                        | 13,188 (99.5)                | 66                       | Imputed with median                                  |
| Glasgow coma scale                      | 12,738 (96.11)               | 516                      | Imputed with median                                  |
| PaO <sub>2</sub> /FiO <sub>2</sub>      | 13,211 (99.68)               | 43                       | None                                                 |
| Serum urea                              | 12,027 (90.74)               | 1227                     | Imputed with median                                  |
| Urine output                            | 12,922 (97.5)                | 332                      | Imputed with median                                  |
| Sodium                                  | 12,795 (96.54)               | 459                      | Imputed with median                                  |
| Potassium                               | 12,802 (96.59)               | 452                      | Imputed with median                                  |
| Bicarbonate                             | 11,337 (85.54)               | 1917                     | Imputed with median                                  |
| Bilirubin                               | 10,753 (81.13)               | 2501                     | Imputed with median                                  |
| White blood cell count                  | 12,483 (94.18)               | 771                      | Imputed with median                                  |

|                              |                |      |      |
|------------------------------|----------------|------|------|
| Chronic disease              | 13,254 (100)   | 0    | None |
| Braden score                 | 13,174 (99.40) | 80   | None |
| Number of patients per nurse | 12,747 (96.17) | 507  | None |
| Date of ICU admission        | 13,239 (99.89) | 15   | None |
| Date of ICU discharge        | 12,837 (96.85) | 417  | None |
| Date of hospital discharge   | 12,017 (90.67) | 1237 | None |
| Hospital survival status     | 12,989 (98)    | 265  | None |

Abbreviation: ICU, intensive care unit

Deduction by other variables was only performed for categorical variables in the absence of inducing a potential error; e.g. if 'Type of admission' was missing while the reason for admission was 'COPD exacerbation', it was deduced that the type of admission would be 'medical'. All continuous variables were imputed by the overall median, except Glasgow Coma Scale because this scale is highly related to neurological pathology.
