# Supplementary material for: Prevalence, associated factors and outcomes of pressure injuries in adult intensive care unit patients: the DecubICUs study
Source: PubMed Central journal article supplement — Intensive Care Med. 2020 Oct 9;47(2):160–9. doi: 10.1007/s00134-020-06234-9 (PMC7880913; doi:10.1007/s00134-020-06234-9), 2020-10-09
Supplement: 134_2020_6234_MOESM9_ESM.pdf [file 134_2020_6234_MOESM9_ESM.pdf]

## Online Resource 9. Prevalence of pressure injuries according to Stages and continents

| Overall prevalence                                | All<br>n = 13,254                                                  | Europe<br>n = 5632                       | North America<br>n = 1507             | Latin, Central<br>and South<br>America<br>n = 1040 | Asia<br>n = 4424                       | Africa<br>n = 246                      | Oceania<br>n = 405                     |
|---------------------------------------------------|--------------------------------------------------------------------|------------------------------------------|---------------------------------------|----------------------------------------------------|----------------------------------------|----------------------------------------|----------------------------------------|
|                                                   | <i>Number of patients (percentage)<br/>95% confidence interval</i> |                                          |                                       |                                                    |                                        |                                        |                                        |
| <b>Overall</b>                                    | <b>3526 (26.6)<br/>95% CI, 25.9–27.3</b>                           | <b>1630 (28.9)<br/>95% CI, 27.8–30.1</b> | <b>344 (22.8)<br/>95% CI, 20.8–25</b> | <b>365 (35.1)<br/>95% CI, 32.2–38.1</b>            | <b>1047 (23.7)<br/>95% CI, 22.4–25</b> | <b>84 (34.2)<br/>95% CI, 28.5–40.1</b> | <b>56 (13.8)<br/>95% CI, 10.8–17.5</b> |
| Stage I                                           | 1691 (12.8)<br>95% CI, 12.2–13.3                                   | 857 (15.2)<br>95% CI, 14.3–16.2          | 143 (9.5)<br>95% CI, 8.1–11.1         | 154 (14.8)<br>95% CI, 12.8–17.1                    | 462 (10.4)<br>95% CI, 9.6–11.4         | 51 (20.7)<br>95% CI, 16.1–26.2         | 24 (5.9)<br>95% CI, 4–8.7              |
| Stage I only <sup>a</sup>                         | 1143 (8.6)<br>95% CI, 8.2–9.1                                      | 571 (10.1)<br>95% CI, 9.4–11             | 96 (6.4)<br>95% CI, 5.2–7.7           | 106 (10.2)<br>95% CI, 8.5–12.2                     | 326 (7.4)<br>95% CI, 6.6–8.2           | 25 (10.2)<br>95% CI, 7–14.6            | 19 (4.7)<br>95% CI, 3–7.2              |
| Stage II                                          | 1510 (11.4)<br>95% CI, 10.9–11.9                                   | 693 (12.3)<br>95% CI, 11.5–13.2          | 130 (8.6)<br>95% CI, 7.3–10.2         | 150 (14.4)<br>95% CI, 12.4–16.7                    | 462 (10.4)<br>95% CI, 9.6–11.4         | 48 (19.5)<br>95% CI, 15–25             | 27 (6.7)<br>95% CI, 4.6–9.5            |
| Stage II only <sup>a</sup>                        | 913 (6.9)<br>95% CI, 6.5–7.3                                       | 394 (7)<br>95% CI, 6.4–7.7               | 84 (5.6)<br>95% CI, 4.5–6.8           | 82 (7.9)<br>95% CI, 6.4–9.7                        | 320 (7.2)<br>95% CI, 6.5–8             | 16 (6.5)<br>95% CI, 4–10.3             | 17 (4.2)<br>95% CI, 2.6–6.6            |
| Stage III                                         | 557 (4.2)<br>95% CI, 3.9–4.6                                       | 277 (4.9)<br>95% CI, 4.4–5.6             | 42 (2.8)<br>95% CI, 2.1–3.8           | 75 (7.2)<br>95% CI, 5.8–8.9                        | 136 (3.1)<br>95% CI, 2.6–3.6           | 20 (8.1)<br>95% CI, 5.3–12.2           | 7 (1.7)<br>95% CI, 0.8–3.5             |
| Stage III only <sup>a</sup>                       | 254 (1.9)<br>95% CI, 1.7–2.1                                       | 112 (2)<br>95% CI, 1.7–2.4               | 21 (1.4)<br>95% CI, 0.9–2.1           | 35 (3.4)<br>95% CI, 2.4–4.7                        | 78 (1.8)<br>95% CI, 1.4–2.2            | 4 (1.6)<br>95% CI, 0.6–4.1             | 4 (1)<br>95% CI, 0.4–2.5               |
| Stage IV                                          | 259 (2)<br>95% CI, 1.7–2.2                                         | 122 (2.2)<br>95% CI, 1.8–2.6             | 24 (1.6)<br>95% CI, 1.1–2.4           | 27 (2.6)<br>95% CI, 1.8–3.8                        | 77 (1.7)<br>95% CI, 1.4–2.2            | 9 (3.7)<br>95% CI, 2–6.8               | NA                                     |
| Stage IV only <sup>a</sup>                        | 105 (0.8)<br>95% CI, 0.7–1                                         | 39 (0.7)<br>95% CI, 0.5–1                | 14 (0.9)<br>95% CI, 0.6–1.6           | 11 (1.1)<br>95% CI, 0.6–1.9                        | 39 (0.9)<br>95% CI, 0.6–1.2            | 2 (0.8)<br>95% CI, 0.2–2.9             | NA                                     |
| Unstageable                                       | 279 (2.1)<br>95% CI, 1.9–2.4                                       | 112 (2)<br>95% CI, 1.7–2.4               | 49 (3.3)<br>95% CI, 2.5–4.3           | 45 (4.3)<br>95% CI, 3.3–5.7                        | 66 (1.5)<br>95% CI, 1.2–1.9            | 2 (0.8)<br>95% CI, 0.2–2.9             | 5 (1.2)<br>95% CI, 0.5–2.9             |
| Unstageable only <sup>a</sup>                     | 132 (1)<br>95% CI, 0.8–1.2                                         | 49 (0.9)<br>95% CI, 0.7–1.2              | 25 (1.7)<br>95% CI, 1.1–2.4           | 21 (2)<br>95% CI, 1.3–3.1                          | 35 (0.8)<br>95% CI, 0.6–1.1            | NA                                     | 2 (0.5)<br>95% CI, 0.1–1.8             |
| Suspected Deep<br>Tissue Injury                   | 303 (2.3)<br>95% CI, 2.1–2.6                                       | 131 (2.3)<br>95% CI, 2–2.8               | 46 (3.1)<br>95% CI, 2.3–4             | 30 (2.9)<br>95% CI, 2–4.1                          | 86 (1.9)<br>95% CI, 1.6–2.4            | 4 (1.6)<br>95% CI, 0.6–4.1             | 6 (1.5)<br>95% CI, 0.7–3.2             |
| Suspected Deep<br>Tissue Injury only <sup>a</sup> | 138 (1)<br>95% CI, 0.9–1.2                                         | 44 (0.8)<br>95% CI, 0.6–1                | 27 (1.8)<br>95% CI, 1.2–2.6           | 15 (1.4)<br>95% CI, 0.9–2.4                        | 49 (1.1)<br>95% CI, 0.8–1.5            | NA                                     | 3 (0.7)<br>95% CI, 0.3–2.1             |
| Stage I only<br>excluded <sup>b</sup>             | 2383 (18)<br>95% CI, 17.3–18.6                                     | 1059 (18.8)<br>95% CI, 17.8–19.9         | 248 (6.5)<br>95% CI, 14.7–18.4        | 259 (24.9)<br>95% CI, 22.4–27.7                    | 721 (16.3)<br>95% CI, 15.2–17.4        | 59 (24)<br>95% CI, 19.1–29.7           | 37 (9.1)<br>95% CI, 6.7–12.3           |

| ICU-acquired prevalence                        | 2145 (16.2)<br>95% CI, 15.6–16.8 | 1124 (20)<br>95% CI, 18.9–21   | 200 (13.3)<br>95% CI, 11.7–15.1 | 237 (22.8)<br>95% CI, 20.3–25.4 | 495 (11.2)<br>95% CI, 10.3–12.2 | 52 (21.1)<br>95% CI, 16.5–26.7 | 37 (9.1)<br>95% CI, 6.7–12.3 |
|------------------------------------------------|----------------------------------|--------------------------------|---------------------------------|---------------------------------|---------------------------------|--------------------------------|------------------------------|
| <b>Proportion of overall prevalence</b>        | <b>60.8%</b>                     | <b>69%</b>                     | <b>58.1%</b>                    | <b>64.9%</b>                    | <b>47.3%</b>                    | <b>61.9%</b>                   | <b>66.1%</b>                 |
| Stage I                                        | 1044 (7.9)<br>95% CI, 7.4–8.4    | 593 (10.5)<br>95% CI, 9.8–11.4 | 94 (6.2)<br>95% CI, 5.1–7.6     | 98 (9.4)<br>95% CI, 7.8–11.4    | 213 (4.8)<br>95% CI, 4.2–5.5    | 29 (11.8)<br>95% CI, 8.3–16.4  | 17 (4.2)<br>95% CI, 2.6–6.6  |
| Stage I only <sup>a</sup>                      | 688 (5.2)<br>95% CI, 4.8–5.6     | 386 (6.9)<br>95% CI, 6.2–7.5   | 61 (4)<br>95% CI, 3.2–5.2       | 73 (7)<br>95% CI, 5.6–8.7       | 137 (3.1)<br>95% CI, 2.6–3.7    | 17 (6.9)<br>95% CI, 4.4–10.8   | 14 (3.5)<br>95% CI, 2.1–5.8  |
| Stage II                                       | 997 (7.5)<br>95% CI, 7.1–8       | 537 (9.5)<br>95% CI, 8.8–10.3  | 81 (5.4)<br>95% CI, 4.4–6.6     | 97 (9.3)<br>95% CI, 7.7–11.3    | 237 (5.4)<br>95% CI, 4.7–6.1    | 29 (11.8)<br>95% CI, 8.3–16.4  | 16 (4)<br>95% CI, 2.5–6.3    |
| Stage II only <sup>a</sup>                     | 547 (4.1)<br>95% CI, 3.8–4.5     | 297 (5.3)<br>95% CI, 4.7–5.9   | 42 (2.8)<br>95% CI, 2.1–3.8     | 61 (5.9)<br>95% CI, 4.6–7.5     | 151 (3.4)<br>95% CI, 2.9–4      | 13 (5.3)<br>95% CI, 3.1–8.8    | 10 (2.5)<br>95% CI, 1.4–4.5  |
| Stage III                                      | 422 (3.2)<br>95% CI, 2.9–3.5     | 226 (4)<br>95% CI, 3.5–4.6     | 32 (2.1)<br>95% CI, 1.6–3       | 46 (4.4)<br>95% CI, 3.3–5.9     | 101 (2.3)<br>95% CI, 1.9–2.8    | 13 (5.3)<br>95% CI, 3.1–8.8    | 4 (1)<br>95% CI, 0.4–2.5     |
| Stage III only <sup>a</sup>                    | 157 (1.2)<br>95% CI 1–1.4        | 71 (1.3)<br>95% CI, 1–1.6      | 14 (0.9)<br>95% CI, 0.6–1.6     | 20 (1.9)<br>95% CI, 1.3–3       | 48 (1.1)<br>95% CI, 0.8–1.4     | 2 (0.8)<br>95% CI, 0.2–2.9     | 2 (0.5)<br>95% CI, 0.1–1.8   |
| Stage IV                                       | 219 (1.7)<br>95% CI 1.5–1.9      | 127 (2.3)<br>95% CI, 1.9–2.7   | 13 (0.9)<br>95% CI, 0.5–1.5     | 19 (1.8)<br>95% CI, 1.2–2.9     | 53 (1.2)<br>95% CI, 0.9–1.6     | 7 (2.9)<br>95% CI, 1.4–5.8     | NA                           |
| Stage IV only <sup>a</sup>                     | 44 (0.3)<br>95% CI 0.25–0.4      | 19 (0.3)<br>95% CI, 0.2–0.5    | 3 (0.2)<br>95% CI, 0.1–0.6      | 6 (0.6)<br>95% CI, 0.3–1.3      | 15 (0.3)<br>95% CI, 0.2–0.6     | 1 (0.4)<br>95% CI, 0.7–2.3     | NA                           |
| Unstageable                                    | 258 (2)<br>95% CI 1.7–2.2        | 129 (2.3)<br>95% CI, 1.9–2.7   | 31 (2.1)<br>95% CI, 1.5–3       | 35 (3.4)<br>95% CI, 2.4–4.7     | 54 (1.2)<br>95% CI, 0.9–1.6     | 5 (2)<br>95% CI, 0.9–4.7       | 4 (1)<br>95% CI, 0.4–2.5     |
| Unstageable only <sup>a</sup>                  | 80 (0.6)<br>95% CI 0.5–0.8       | 32 (0.6)<br>95% CI, 0.4–0.8    | 15 (1)<br>95% CI, 0.6–1.6       | 14 (1.4)<br>95% CI, 0.8–2.3     | 17 (0.4)<br>95% CI, 0.2–0.6     | NA                             | 2 (0.5)<br>95% CI, 0.1–1.8   |
| Suspected Deep Tissue Injury                   | 269 (2)<br>95% CI 1.8–2.3        | 138 (2.5)<br>95% CI, 2.1–2.9   | 33 (2.2)<br>95% CI, 1.6–3.1     | 27 (2.6)<br>95% CI, 1.8–3.8     | 61 (1.4)<br>95% CI, 1.1–1.8     | 6 (2.4)<br>95% CI, 1.1–5.2     | 4 (1)<br>95% CI, 0.4–2.5     |
| Suspected Deep Tissue Injury only <sup>a</sup> | 82 (0.6)<br>95% CI 0.5–0.8       | 25 (0.4)<br>95% CI, 0.3–0.7    | 19 (1.3)<br>95% CI, 0.8–2       | 11 (1.1)<br>95% CI, 0.6–1.9     | 24 (0.5)<br>95% CI, 0.4–0.8     | NA                             | 3 (0.7)<br>95% CI, 0.3–2.2   |
| Stage I only excluded <sup>b</sup>             | 1457 (11)<br>95% CI 10.5–11.5    | 738 (13.1)<br>95% CI, 12.2–14  | 139 (9.2)<br>95% CI, 7.9–10.8   | 164 (15.8)<br>95% CI, 13.7–18.1 | 358 (8.1)<br>95% CI, 7.3–8.9    | 35 (14.2)<br>95% CI, 10.4–19.2 | 23 (5.7)<br>95% CI, 3.8–8.4  |

Abbreviation: ICU, intensive care unit; NA, not applicable

<sup>a</sup>Stage I, II, III, IV only – Unstageable only – Suspected Deep Tissue Injury only: number of patients with pressure injuries of the specified stage only, without any pressure injuries of other categories

<sup>b</sup>Stage I only excluded: number of patients with pressure injuries of all categories, except patients with pressure injuries of Stage I only
