# Supplementary material for: Prevalence, associated factors and outcomes of pressure injuries in adult intensive care unit patients: the DecubICUs study
Source: PubMed Central journal article supplement — Intensive Care Med. 2020 Oct 9;47(2):160–9. doi: 10.1007/s00134-020-06234-9 (PMC7880913; doi:10.1007/s00134-020-06234-9), 2020-10-09
Supplement: 134_2020_6234_MOESM10_ESM.pdf [file 134_2020_6234_MOESM10_ESM.pdf]

## Online Resource 10. Pressure injury prevalence according to the World Bank classification of countries

|                                           | <b>Low<sup>a</sup> (n = 34) + Lower-middle<sup>b</sup> (n = 519)<br/>income economies (n = 553)</b><br>Mean (SD) % of gross national income<br>spent on healthcare is 4.9 (1.9) | <b>Upper-middle<sup>c</sup> income economies<br/>(n = 4946)</b><br>Mean (SD) % of gross national income<br>spent on healthcare is 5.9 (2.1) | <b>High<sup>d</sup> income economies<br/>(n = 7755)</b><br>Mean (SD) % of gross national income<br>spent on healthcare is 10.3 (2.9) |
|-------------------------------------------|---------------------------------------------------------------------------------------------------------------------------------------------------------------------------------|---------------------------------------------------------------------------------------------------------------------------------------------|--------------------------------------------------------------------------------------------------------------------------------------|
|                                           | <i>Number of patients (percentage)<br/>95% confidence interval</i>                                                                                                              |                                                                                                                                             |                                                                                                                                      |
| <b>Overall prevalence</b>                 | 225 (40.7)<br>36.7–44.8                                                                                                                                                         | 1294 (26.2)<br>25.0–27.4                                                                                                                    | 2007 (25.9)<br>24.9–26.9                                                                                                             |
| <b>ICU-acquired prevalence</b>            | 153 (27.7)<br>24.1–31.5                                                                                                                                                         | 732 (14.8)<br>13.8–15.8                                                                                                                     | 1260 (16.3)<br>15.5–17.1                                                                                                             |
| <b>Proportion ICU-acquired prevalence</b> | 68%                                                                                                                                                                             | 56.6%                                                                                                                                       | 62.8%                                                                                                                                |

Countries are classified according to the 2016 World Bank classification in low, lower-middle, upper-middle and high economies (<https://data.worldbank.org/indicator/SH.XPD.CHEX.GD.ZS>)

Percentages of gross national income spent on healthcare are for calendar year 2016 (World Bank's fiscal year 2018) and according to the World Health Organisation (<http://apps.who.int/nha/database>)

Abbreviations: SD, standard deviation; ICU: intensive care unit

Due to the small amount of participants in low economy countries, low economy countries were merged with the category of countries with lower-middle economies (p for differences in overall pressure injury prevalence between these two categories is 0.369)

<sup>a</sup>Low-income economies: gross national income per capita ≤ US\$1005: Nepal, Rwanda

<sup>b</sup>Lower-middle income economies: gross national income per capita US\$1006–US\$3955: Angola, Bangladesh, Bolivia, Cameroon, Ghana, Honduras, India, Indonesia, Kenya, Kingdom of Eswatini, Moldova, Mongolia, Morocco, Nigeria, Pakistan, Philippines, Tunisia, Ukraine

<sup>c</sup>Upper-middle income economies: gross national income per capita US\$956–US\$12 235: Albania, Argentina, Bosnia & Herzegovina, Brazil, China, Colombia, Croatia, Ecuador, Iran, Jamaica, Kosovo, Lebanon, Libya, North Macedonia, Malaysia, Mauritius, Mexico, Paraguay, Romania, Russian Federation, Serbia, South Africa, Suriname, Thailand, Turkey, Venezuela

<sup>d</sup>High income economies: gross national income per capita > US\$12 235: Andorra, Australia, Austria, Bahrain, Belgium, Brunei Darussalam, Canada, Chile, Cyprus, Czech Republic, Denmark, Estonia, Finland, France, Germany, Greece, Hungary, Iceland, Ireland, Israel, Italy, Japan, Latvia, Lithuania, Luxembourg, the Netherlands, New Zealand, Norway, Poland, Portugal, Qatar, Republic of Korea, Saudi Arabia, Slovakia, Slovenia, Spain, Sweden, Switzerland, Taiwan, Trinidad & Tobago, United Arab Emirates, United Kingdom, United States, Uruguay

Data on % gross national income spent on healthcare are not available for Kosovo, Libya, and Taiwan
