# Supplementary material for: Prevalence, associated factors and outcomes of pressure injuries in adult intensive care unit patients: the DecubICUs study
Source: PubMed Central journal article supplement — Intensive Care Med. 2020 Oct 9;47(2):160–9. doi: 10.1007/s00134-020-06234-9 (PMC7880913; doi:10.1007/s00134-020-06234-9), 2020-10-09
Supplement: 134_2020_6234_MOESM11_ESM.pdf [file 134_2020_6234_MOESM11_ESM.pdf]

## Online Resource 11. Pressure injuries according to anatomical location and Stages

| Anatomical location        | Overall pressure injuries (n = 6747) |            |            |            |             |                              |             | ICU-acquired pressure injuries (n = 3997) |            |            |           |             |                              |             | % ICU-acquired |
|----------------------------|--------------------------------------|------------|------------|------------|-------------|------------------------------|-------------|-------------------------------------------|------------|------------|-----------|-------------|------------------------------|-------------|----------------|
|                            | Stage I                              | Stage II   | Stage III  | Stage IV   | Unstageable | Suspected Deep Tissue Injury | Total       | Stage I                                   | Stage II   | Stage III  | Stage IV  | Unstageable | Suspected Deep Tissue Injury | Total       |                |
| <b>Head (n)</b>            | <b>107</b>                           | <b>76</b>  | <b>34</b>  | <b>10</b>  | <b>30</b>   | <b>16</b>                    | <b>273</b>  | <b>70</b>                                 | <b>53</b>  | <b>28</b>  | <b>8</b>  | <b>19</b>   | <b>10</b>                    | <b>188</b>  | <b>68.9</b>    |
| % within Stage             | 4.2                                  | 3.5        | 4.4        | 3.1        | 7.2         | 3.3                          | 4.1         | 4.4                                       | 4          | 6.2        | 5.5       | 8.6         | 3.9                          | 4.7         |                |
| % within body site         | 39.2                                 | 27.8       | 12.5       | 3.7        | 11          | 5.9                          | 100         | 37.2                                      | 28.2       | 14.9       | 4.3       | 10.1        | 5.3                          | 100         |                |
| <b>Ears (n)</b>            | <b>129</b>                           | <b>111</b> | <b>27</b>  | <b>13</b>  | <b>27</b>   | <b>13</b>                    | <b>320</b>  | <b>88</b>                                 | <b>81</b>  | <b>25</b>  | <b>12</b> | <b>19</b>   | <b>6</b>                     | <b>231</b>  | <b>72.2</b>    |
| % within Stage             | 5                                    | 5.1        | 3.5        | 4          | 6.4         | 2.7                          | 4.7         | 5.5                                       | 6.1        | 5.5        | 8.3       | 8.6         | 2.4                          | 5.8         |                |
| % within body site         | 40.3                                 | 34.7       | 8.4        | 4.1        | 8.4         | 4.1                          | 100         | 38.1                                      | 35.1       | 10.8       | 5.2       | 8.2         | 2.6                          | 100         |                |
| <b>Nose (n)</b>            | <b>102</b>                           | <b>71</b>  | <b>10</b>  | <b>4</b>   | <b>5</b>    | <b>10</b>                    | <b>202</b>  | <b>81</b>                                 | <b>56</b>  | <b>9</b>   | <b>2</b>  | <b>2</b>    | <b>9</b>                     | <b>159</b>  | <b>78.7</b>    |
| % within Stage             | 4                                    | 3.2        | 1.3        | 1.2        | 1.2         | 2.1                          | 3           | 5.1                                       | 4.2        | 2          | 1.4       | 0.9         | 3.5                          | 4           |                |
| % within body site         | 50.5                                 | 35.2       | 5          | 2          | 2.5         | 5                            | 100         | 50.9                                      | 35.2       | 5.7        | 1         | 1           | 5.7                          | 100         |                |
| <b>Mouth (n)</b>           | <b>62</b>                            | <b>87</b>  | <b>9</b>   | <b>1</b>   | <b>11</b>   | <b>13</b>                    | <b>183</b>  | <b>52</b>                                 | <b>74</b>  | <b>8</b>   | <b>1</b>  | <b>8</b>    | <b>5</b>                     | <b>148</b>  | <b>80.1</b>    |
| % within Stage             | 2.4                                  | 4          | 1.2        | 0.3        | 2.6         | 2.7                          | 2.7         | 3.3                                       | 5.6        | 1.8        | 0.7       | 3.6         | 2                            | 3.7         |                |
| % within body site         | 33.9                                 | 47.5       | 4.9        | 0.6        | 6           | 7.1                          | 100         | 35.1                                      | 50         | 5.4        | 0.7       | 5.4         | 3.4                          | 100         |                |
| <b>Chest (n)</b>           | <b>37</b>                            | <b>41</b>  | <b>5</b>   | <b>2</b>   | <b>5</b>    | <b>2</b>                     | <b>92</b>   | <b>24</b>                                 | <b>30</b>  | <b>3</b>   | <b>NA</b> | <b>2</b>    | <b>1</b>                     | <b>60</b>   | <b>65.2</b>    |
| % within Stage             | 1.4                                  | 1.9        | 0.7        | 0.6        | 1.2         | 0.4                          | 1.4         | 1.5                                       | 2.3        | 0.7        | NA        | 0.9         | 0.4                          | 1.5         |                |
| % within body site         | 40.2                                 | 44.6       | 5.4        | 2.2        | 5.4         | 2.2                          | 100         | 40                                        | 50         | 5          | NA        | 3.3         | 1.7                          | 100         |                |
| <b>Shoulders front (n)</b> | <b>53</b>                            | <b>28</b>  | <b>9</b>   | <b>6</b>   | <b>4</b>    | <b>3</b>                     | <b>103</b>  | <b>33</b>                                 | <b>15</b>  | <b>4</b>   | <b>NA</b> | <b>NA</b>   | <b>3</b>                     | <b>55</b>   | <b>53.3</b>    |
| % within Stage             | 2.1                                  | 1.3        | 1.2        | 1.8        | 1           | 0.6                          | 1.5         | 2.1                                       | 1.1        | 0.9        | NA        | NA          | 1.2                          | 1.4         |                |
| % within body site         | 51.5                                 | 27.1       | 8.7        | 5.8        | 3.9         | 2.9                          | 100         | 60                                        | 27.3       | 7.3        | NA        | NA          | 5.5                          | 100         |                |
| <b>Shoulders back (n)</b>  | <b>187</b>                           | <b>133</b> | <b>25</b>  | <b>7</b>   | <b>14</b>   | <b>9</b>                     | <b>375</b>  | <b>121</b>                                | <b>80</b>  | <b>18</b>  | <b>2</b>  | <b>4</b>    | <b>6</b>                     | <b>231</b>  | <b>61.6</b>    |
| % within Stage             | 7.3                                  | 6.1        | 3.2        | 2.2        | 3.3         | 1.9                          | 5.6         | 7.6                                       | 6          | 4          | 1.4       | 1.8         | 2.4                          | 5.8         |                |
| % within body site         | 49.9                                 | 35.5       | 6.7        | 1.9        | 3.7         | 2.4                          | 100         | 52.4                                      | 34.6       | 7.8        | 0.9       | 1.7         | 2.6                          | 100         |                |
| <b>Elbows (n)</b>          | <b>27</b>                            | <b>22</b>  | <b>3</b>   | <b>4</b>   | <b>4</b>    | <b>6</b>                     | <b>66</b>   | <b>26</b>                                 | <b>16</b>  | <b>1</b>   | <b>4</b>  | <b>4</b>    | <b>6</b>                     | <b>57</b>   | <b>86.3</b>    |
| % within Stage             | 1.1                                  | 1          | 0.4        | 1.2        | 1           | 1.2                          | 1           | 1.6                                       | 1.2        | 0.2        | 2.8       | 1.8         | 2.4                          | 1.4         |                |
| % within body site         | 40.9                                 | 33.3       | 4.6        | 6.1        | 6.1         | 9.1                          | 100         | 45.6                                      | 28.1       | 1.8        | 7         | 7           | 10.5                         | 100         |                |
| <b>Hands (n)</b>           | <b>7</b>                             | <b>3</b>   | <b>2</b>   | <b>NA</b>  | <b>1</b>    | <b>4</b>                     | <b>17</b>   | <b>6</b>                                  | <b>2</b>   | <b>2</b>   | <b>NA</b> | <b>1</b>    | <b>4</b>                     | <b>15</b>   | <b>88.2</b>    |
| % within Stage             | 0.3                                  | 0.1        | 0.3        | NA         | 0.2         | 0.8                          | 0.3         | 0.4                                       | 0.2        | 0.4        | NA        | 0.5         | 1.6                          | 0.4         |                |
| % within body site         | 41.2                                 | 17.7       | 11.8       | NA         | 5.6         | 23.5                         | 100         | 40                                        | 13.3       | 13.3       | NA        | 6.7         | 26.7                         | 100         |                |
| <b>Hips (n)</b>            | <b>108</b>                           | <b>143</b> | <b>54</b>  | <b>24</b>  | <b>21</b>   | <b>15</b>                    | <b>365</b>  | <b>51</b>                                 | <b>77</b>  | <b>21</b>  | <b>12</b> | <b>7</b>    | <b>5</b>                     | <b>173</b>  | <b>47.4</b>    |
| % within Stage             | 4.2                                  | 6.6        | 7          | 7.4        | 5           | 3.1                          | 5.4         | 3.2                                       | 5.8        | 4.6        | 8.3       | 3.2         | 2                            | 4.3         |                |
| % within body site         | 29.6                                 | 39.1       | 14.8       | 6.6        | 5.8         | 4.1                          | 100         | 29.5                                      | 44.5       | 12.1       | 6.9       | 4.1         | 2.9                          | 100         |                |
| <b>Genitals (n)</b>        | <b>68</b>                            | <b>57</b>  | <b>12</b>  | <b>6</b>   | <b>7</b>    | <b>3</b>                     | <b>153</b>  | <b>38</b>                                 | <b>40</b>  | <b>7</b>   | <b>4</b>  | <b>5</b>    | <b>1</b>                     | <b>95</b>   | <b>62.1</b>    |
| % within Stage             | 2.6                                  | 2.6        | 1.5        | 1.8        | 1.7         | 0.6                          | 2.3         | 2.4                                       | 2.3        | 1.5        | 2.8       | 2.3         | 0.4                          | 2.4         |                |
| % within body site         | 44.4                                 | 37.3       | 7.8        | 3.9        | 4.6         | 2                            | 100         | 40                                        | 42.1       | 7.4        | 4.2       | 5.3         | 1.1                          | 100         |                |
| <b>Sacral region (n)</b>   | <b>808</b>                           | <b>911</b> | <b>350</b> | <b>182</b> | <b>133</b>  | <b>111</b>                   | <b>2495</b> | <b>460</b>                                | <b>518</b> | <b>204</b> | <b>79</b> | <b>70</b>   | <b>56</b>                    | <b>1387</b> | <b>55.6</b>    |
| % within Stage             | 31.4                                 | 42         | 45.2       | 55.8       | 31.7        | 23                           | 37          | 28.9                                      | 38.8       | 44.8       | 54.4      | 31.8        | 22.1                         | 34.7        |                |

|                                         |             |             |            |            |            |            |             |             |             |            |            |            |            |             |             |
|-----------------------------------------|-------------|-------------|------------|------------|------------|------------|-------------|-------------|-------------|------------|------------|------------|------------|-------------|-------------|
| % within body site                      | 32.4        | 36.5        | 14         | 7.3        | 5.3        | 4.5        | 100         | 33.2        | 37.4        | 14.7       | 5.7        | 5.1        | 4          | 100         |             |
| <b>Knees (n)</b>                        | <b>40</b>   | <b>35</b>   | <b>21</b>  | <b>3</b>   | <b>5</b>   | <b>19</b>  | <b>123</b>  | <b>17</b>   | <b>21</b>   | <b>10</b>  | <b>1</b>   | <b>1</b>   | <b>7</b>   | <b>57</b>   | <b>46.3</b> |
| % within Stage                          | 1.6         | 1.6         | 2.7        | 0.9        | 1.2        | 3.9        | 1.8         | 1.1         | 1.6         | 2.2        | 0.7        | 0.5        | 2.8        | 1.4         |             |
| % within body site                      | 32.5        | 28.5        | 17.1       | 2.4        | 4.1        | 15.5       | 100         | 29.8        | 36.8        | 17.5       | 1.8        | 1.8        | 12.3       | 100         |             |
| <b>Calves (n)</b>                       | <b>82</b>   | <b>78</b>   | <b>40</b>  | <b>4</b>   | <b>14</b>  | <b>16</b>  | <b>234</b>  | <b>50</b>   | <b>52</b>   | <b>21</b>  | <b>1</b>   | <b>4</b>   | <b>9</b>   | <b>137</b>  | <b>58.5</b> |
| % within Stage                          | 3.2         | 3.6         | 5.2        | 1.2        | 3.3        | 3.3        | 3.5         | 3.2         | 3.9         | 4.6        | 0.7        | 1.8        | 3.5        | 3.4         |             |
| % within body site                      | 35          | 33.3        | 17.1       | 1.7        | 6          | 6.8        | 100         | 36.5        | 38          | 15.3       | 0.7        | 2.9        | 6.6        | 100         |             |
| <b>Feet (n)</b>                         | <b>153</b>  | <b>90</b>   | <b>53</b>  | <b>22</b>  | <b>35</b>  | <b>53</b>  | <b>406</b>  | <b>80</b>   | <b>53</b>   | <b>30</b>  | <b>4</b>   | <b>20</b>  | <b>22</b>  | <b>209</b>  | <b>51.5</b> |
| % within Stage                          | 5.9         | 4.2         | 6.8        | 6.8        | 8.4        | 11         | 6           | 5           | 4           | 6.6        | 2.8        | 9.1        | 8.7        | 5.2         |             |
| % within body site                      | 37.7        | 22.1        | 13.1       | 5.4        | 8.6        | 13.1       | 100         | 38.3        | 25.3        | 14.4       | 1.9        | 9.6        | 10.5       | 100         |             |
| <b>Heels (n)</b>                        | <b>600</b>  | <b>274</b>  | <b>119</b> | <b>35</b>  | <b>101</b> | <b>188</b> | <b>1317</b> | <b>388</b>  | <b>155</b>  | <b>62</b>  | <b>13</b>  | <b>52</b>  | <b>103</b> | <b>773</b>  | <b>58.7</b> |
| % within Stage                          | 23.3        | 12.6        | 15.4       | 10.7       | 24.1       | 39         | 19.5        | 24.4        | 11.6        | 13.6       | 9          | 23.6       | 40.5       | 19.3        |             |
| % within body site                      | 45.6        | 20.8        | 9          | 2.7        | 7.7        | 14.3       | 100         | 50.2        | 20.1        | 8          | 1.7        | 6.7        | 13.3       | 100         |             |
| <b>Other body sites<sup>a</sup> (n)</b> | <b>4</b>    | <b>11</b>   | <b>2</b>   | <b>3</b>   | <b>2</b>   | <b>1</b>   | <b>23</b>   | <b>4</b>    | <b>11</b>   | <b>2</b>   | <b>2</b>   | <b>2</b>   | <b>1</b>   | <b>22</b>   | <b>95.6</b> |
| <b>Total (n)</b>                        | <b>2574</b> | <b>2171</b> | <b>775</b> | <b>326</b> | <b>419</b> | <b>482</b> | <b>6747</b> | <b>1589</b> | <b>1334</b> | <b>455</b> | <b>145</b> | <b>220</b> | <b>254</b> | <b>3997</b> | <b>59.2</b> |

Abbreviations: ICU, intensive care unit; n, numbers

<sup>a</sup>Other body sites: forehead, cheeks, chin, throat, back, forearms, thighs, ankles, toes
