# Supplementary material for: Prevalence, associated factors and outcomes of pressure injuries in adult intensive care unit patients: the DecubICUs study
Source: Springer Nature journal article supplement (doi:10.1007/s00134-020-06234-9), 2020-10-09
Supplement: MOESM12 [file 18467038]

**Online Resource 12. Factors independently associated with hospital mortality**

| Variable                              | Odds Ratio | 95% confidence interval |
|---------------------------------------|------------|-------------------------|
| Admission type: medical               | 1.84       | 1.5–2.25                |
| Admission type: elective surgery      | 1.04       | 0.82–1.31               |
| Admission type: emergency surgery     | 1.42       | 1.14–1.76               |
| Age                                   | 1.005      | 1.002–1.009             |
| Male sex                              | 1.04       | 0.94–1.15               |
| Body Mass Index                       |            |                         |
| 18.5–24.9: normal weight              | Reference  |                         |
| <18.5: underweight                    | 1.37       | 1.09–1.71               |
| 25–29.9: pre-obesity                  | 0.93       | 0.83–1.05               |
| ≥30: obesity                          | 0.85       | 0.74–0.98               |
| Acquired Immune Deficiency Syndrome   | 0.72       | 0.36–1.45               |
| Cirrhosis                             | 1.75       | 1.36–2.26               |
| Chronic Obstructive Pulmonary Disease | 1.05       | 0.90–1.22               |
| Diabetes                              | 1.02       | 0.90–1.15               |
| Heart failure                         | 1.21       | 1.05–1.4                |
| Immunocompromised                     | 1.26       | 1.04–1.52               |
| Malignancy                            | 1.46       | 1.25–1.71               |
| Peripheral vascular disease           | 0.99       | 0.79–1.23               |
| Mechanical ventilation on admission   | 1.31       | 1.17–1.47               |
| Vasopressor use                       | 1.45       | 1.29–1.62               |
| Renal replacement                     | 1.3        | 1.12–1.51               |
| Simplified Acute Physiology Score II  | 1.054      | 1.05–1.058              |
| Number of patients per nurse          | 0.95       | 0.9–1.005               |
| Length of hospital stay               | 1.00009    | 0.99– 1.0002            |
| Worst pressure injury                 |            |                         |
| No pressure injury                    | Reference  |                         |
| Stage I                               | 1.31       | 1.1–1.55                |
| Stage II                              | 1.66       | 1.41–1.95               |
| Stage III or worse                    | 2.31       | 1.96–2.71               |
| Economy                               |            |                         |
| High-income economy                   | Reference  |                         |
| Upper-middle income economy           | 1.84       | 1.4–2.41                |
| Low- + lower-middle income economy    | 2.46       | 1.74–3.48               |
